# Supplementary material
Source: ML conference proceedings conference paper supplement (https://www.ecva.net/papers/eccv_2020/papers_ECCV/html/123750120_ECCV_2020_paper.php)
Supplement: Supplementary file 2 [file 123750120-supp.zip]

| Method             | cross-entropy optimization |             |              |             | CIDEr optimization |             |              |             |
|--------------------|----------------------------|-------------|--------------|-------------|--------------------|-------------|--------------|-------------|
|                    | B@4                        | M           | C            | S           | B@4                | M           | C            | S           |
| BUTD [2]           | 36.2                       | 27.0        | 113.5        | 20.3        | 36.3               | 27.7        | 120.1        | 21.4        |
| VLP [47]           | 36.5                       | 28.4        | 117.7        | 21.3        | 39.5               | 29.3        | 129.3        | 23.2        |
| AoANet [11]        | 37.2                       | 28.4        | 119.8        | 21.3        | 38.9               | 29.2        | 129.8        | 22.4        |
| OSCAR <sub>B</sub> | 36.5                       | <b>30.3</b> | <b>123.7</b> | <b>23.1</b> | <b>40.5</b>        | <b>29.7</b> | <b>137.6</b> | <b>22.8</b> |
| OSCAR <sub>L</sub> | <b>37.4</b>                | <b>30.7</b> | <b>127.8</b> | <b>23.5</b> | <b>41.7</b>        | <b>30.6</b> | <b>140.0</b> | <b>24.5</b> |
