# Supplementary material
Source: ML conference proceedings conference paper supplement (https://www.ecva.net/papers/eccv_2020/papers_ECCV/html/123750120_ECCV_2020_paper.php)
Supplement: Supplementary file 3 [file 123750120-supp.zip]

Image-Text Pairs: 6.5M

- ① Masked Token Loss    ② Contrastive Loss

## Image-Text Representation

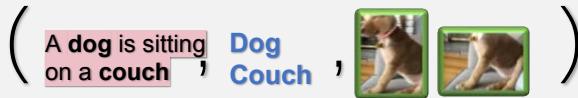

Word-Tag-Region Triplet

Pre-training

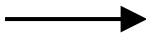

Fine-tuning

## Understanding

- VQA
- GQA
- NLVR2
- Image-Text Retrieval
- Text-Image Retrieval

## Generation

- Image Captioning
- Novel Object Captioning
