# Supplementary material
Source: ML conference proceedings conference paper supplement (https://www.ecva.net/papers/eccv_2020/papers_ECCV/html/123750120_ECCV_2020_paper.php)
Supplement: Supplementary file 4 [file 123750120-supp.zip]

| Method | ViLBERT | VL-BERT | VisualBERT | LXMERT | 12-in-1 | UNITER <sub>B</sub> | UNITER <sub>L</sub> | OSCAR <sub>B</sub> | OSCAR <sub>L</sub> |
|--------|---------|---------|------------|--------|---------|---------------------|---------------------|--------------------|--------------------|
|--------|---------|---------|------------|--------|---------|---------------------|---------------------|--------------------|--------------------|

|          |       |       |       |       |       |       |              |       |              |
|----------|-------|-------|-------|-------|-------|-------|--------------|-------|--------------|
| Test-dev | 70.63 | 70.50 | 70.80 | 72.42 | 73.15 | 72.27 | <b>73.24</b> | 73.16 | <b>73.61</b> |
|----------|-------|-------|-------|-------|-------|-------|--------------|-------|--------------|

|          |       |       |       |       |   |       |       |       |              |
|----------|-------|-------|-------|-------|---|-------|-------|-------|--------------|
| Test-std | 70.92 | 70.83 | 71.00 | 72.54 | — | 72.46 | 73.40 | 73.44 | <b>73.82</b> |
|----------|-------|-------|-------|-------|---|-------|-------|-------|--------------|
