# Supplementary material
Source: ML conference proceedings conference paper supplement (https://www.ecva.net/papers/eccv_2020/papers_ECCV/html/123750120_ECCV_2020_paper.php)
Supplement: Supplementary file 7 [file 123750120-supp.zip]

| Source     | COCO<br>(train) | CC<br>(all) | SBU<br>(all) | Flicker30k<br>(train) | VQA<br>(train) | GQA<br>(bal-train) | VG-QA<br>(train) | Total     |
|------------|-----------------|-------------|--------------|-----------------------|----------------|--------------------|------------------|-----------|
| Image/Text | 113k/609k       | 3.0M/3.0M   | 980k/980k    | 29k/29k               | 83k/444k       | 82k/946k           | 48k/484k         | 4.1M/6.5M |
