# Supplementary material
Source: ML conference proceedings conference paper supplement (https://www.ecva.net/papers/eccv_2020/papers_ECCV/html/123750120_ECCV_2020_paper.php)
Supplement: Supplementary file 9 [file 123750120-supp.zip]

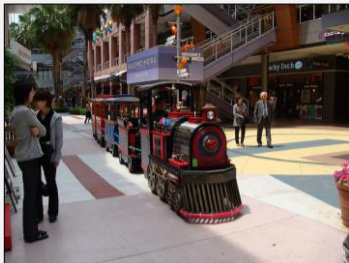

**Oscar**: a small **train** on a city **street** with **people** near by .

**Baseline**: a **train** that is sitting on the side of the road .

**GT**: a small **train** on a city **street** with **people** near by .

A black and red small **train** in shopping area.

A group of **people** near a small railroad **train** in a mall .

**Tags**: sign, tree, sidewalk, **train**, woman, person, trees, **street**, bus, stairs, store, man, balcony, building, **people**

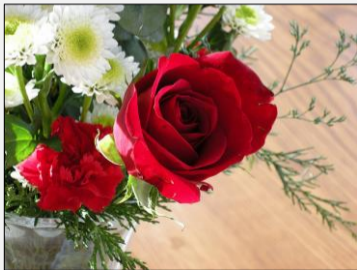

**Oscar**: a red **rose** and white **flowers** in a **vase** .

**Baseline**: a **vase** filled with red and white **flowers** .

**GT**: A red **rose** in a glass **vase** on a **table**  
beautiful red **rose** and white **flowers** are in a **vase** .

The **bouquet** has one red **rose** in it.

**Tags**: leaf, **bouquet**, **flowers**, stem, **table**, **rose**, flower, leaves, **vase**, plant
