# Supplementary material
Source: ML conference proceedings conference paper supplement (https://www.ecva.net/papers/eccv_2020/papers_ECCV/html/123750120_ECCV_2020_paper.php)
Supplement: Supplementary file 16 [file 123750120-supp.zip]

| Method                          | in-domain   |             | near-domain |             | out-of-domain |             | overall     |             |
|---------------------------------|-------------|-------------|-------------|-------------|---------------|-------------|-------------|-------------|
|                                 | CIDEr       | SPICE       | CIDEr       | SPICE       | CIDEr         | SPICE       | CIDEr       | SPICE       |
| UpDown [1]                      | 78.1        | 11.6        | 57.7        | 10.3        | 31.3          | 8.3         | 55.3        | 10.1        |
| UpDown + CBS [1]                | 80.0        | 12.0        | 73.6        | 11.3        | 66.4          | 9.7         | 73.1        | 11.1        |
| UpDown + ELMo + CBS [1]         | 79.3        | <b>12.4</b> | 73.8        | 11.4        | 71.7          | 9.9         | 74.3        | 11.2        |
| OSCAR <sub>B</sub>              | 79.6        | 12.3        | 66.1        | 11.5        | 45.3          | 9.7         | 63.8        | 11.2        |
| OSCAR <sub>B</sub> + CBS        | 80.0        | 12.1        | 80.4        | <b>12.2</b> | 75.3          | <b>10.6</b> | 79.3        | <b>11.9</b> |
| OSCAR <sub>B</sub> + SCST + CBS | <b>83.4</b> | 12.0        | <b>81.6</b> | 12.0        | <b>77.6</b>   | <b>10.6</b> | <b>81.1</b> | 11.7        |
| OSCAR <sub>L</sub>              | 79.9        | <b>12.4</b> | 68.2        | 11.8        | 45.1          | 9.4         | 65.2        | 11.4        |
| OSCAR <sub>L</sub> + CBS        | 78.8        | 12.2        | 78.9        | <b>12.1</b> | 77.4          | 10.5        | 78.6        | <b>11.8</b> |
| OSCAR <sub>L</sub> + SCST + CBS | <b>85.4</b> | 11.9        | <b>84.0</b> | 11.7        | <b>80.3</b>   | 10.0        | <b>83.4</b> | 11.4        |
