# Supplementary material
Source: ML conference proceedings conference paper supplement (https://www.ecva.net/papers/eccv_2020/papers_ECCV/html/123750120_ECCV_2020_paper.php)
Supplement: Supplementary file 20 [file 123750120-supp.zip]

| Method                          | Test-dev     | Test-std     |
|---------------------------------|--------------|--------------|
| LXMERT [39]                     | 60.00        | 60.33        |
| MMN [4]                         | —            | 60.83        |
| 12-in-1 [24]                    | —            | 60.65        |
| NSM [12]                        | —            | <b>63.17</b> |
| OSCAR <sub>B</sub>              | 61.19        | 61.23        |
| OSCAR <sub>B</sub> <sup>*</sup> | <b>61.58</b> | <b>61.62</b> |
