# Supplementary material
Source: ML conference proceedings conference paper supplement (https://www.ecva.net/papers/eccv_2020/papers_ECCV/html/123750120_ECCV_2020_paper.php)
Supplement: Supplementary file 21 [file 123750120-supp.zip]

| Attention  |            |            | Text R. |      | Image R. |      |
|------------|------------|------------|---------|------|----------|------|
| <i>w-v</i> | <i>w-q</i> | <i>v-q</i> | R@1     | R@5  | R@1      | R@5  |
| ✓          | ✓          | ✓          | 77.3    | 95.6 | 65.2     | 91.5 |
| ✓          |            |            | 75.4    | 94.8 | 64.2     | 91.4 |
|            | ✓          |            | 32.3    | 57.6 | 25.7     | 60.1 |
