# Supplementary material
Source: ML conference proceedings conference paper supplement (https://www.ecva.net/papers/eccv_2020/papers_ECCV/html/123750120_ECCV_2020_paper.php)
Supplement: Supplementary file 22 [file 123750120-supp.zip]

| Method | MAC  | VisualBERT | LXMERT | 12-in-1 | UNITER <sub>B</sub> | UNITER <sub>L</sub> | OSCAR <sub>B</sub> | OSCAR <sub>L</sub> |
|--------|------|------------|--------|---------|---------------------|---------------------|--------------------|--------------------|
| Dev    | 50.8 | 67.40      | 74.90  | —       | 77.14               | <b>78.40</b>        | 78.07              | <b>79.12</b>       |
| Test-P | 51.4 | 67.00      | 74.50  | 78.87   | 77.87               | <b>79.50</b>        | 78.36              | <b>80.37</b>       |
