# Supplementary material
Source: ML conference proceedings conference paper supplement (https://www.ecva.net/papers/eccv_2020/papers_ECCV/html/123750120_ECCV_2020_paper.php)
Supplement: Supplementary file 23 [file 123750120-supp.zip]

## Image-Text Pairs: 6.5M

- ① Masked Token Modeling
- ② Contrastive Loss

### Image-Text Representation

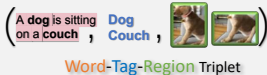

Pre-training

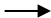

Fine-tuning

### Understanding

- VQA
- GQA
- NLVR2
- Image-Text Retrieval
- Text-Image Retrieval

### Generation

- Image Captioning
- Novel Object Captioning

**Fig. 1.** OSCAR pipeline. The model takes a triplet as input sequence, is pre-trained with two objectives (a masked token loss over words & tags, and a contrastive loss between tags and others), and fine-tuned for 5 understanding and 2 generation tasks (detailed in Section 4).
