# Supplementary material
Source: ML conference proceedings conference paper supplement (https://www.ecva.net/papers/eccv_2020/papers_ECCV/html/123750120_ECCV_2020_paper.php)
Supplement: Supplementary file 26 [file 123750120-supp.zip]

| Method           | Size | Text Retrieval |      |      | Image Retrieval |      |      | Text Retrieval |      |      | Image Retrieval |      |      |
|------------------|------|----------------|------|------|-----------------|------|------|----------------|------|------|-----------------|------|------|
|                  |      | R@1            | R@5  | R@10 | R@1             | R@5  | R@10 | R@1            | R@5  | R@10 | R@1             | R@5  | R@10 |
|                  |      | 1K Test Set    |      |      |                 |      |      | 5K Test Set    |      |      |                 |      |      |
| DVSA [14]        | -    | 38.4           | 69.9 | 80.5 | 27.4            | 60.2 | 74.8 | -              | -    | -    | -               | -    | -    |
| VSE++ [7]        | -    | 64.7           | -    | 95.9 | 52.0            | -    | 92.0 | 41.3           | -    | 81.2 | 30.3            | -    | 72.4 |
| DPC [46]         | -    | 65.6           | 89.8 | 95.5 | 47.1            | 79.9 | 90.0 | 41.2           | 70.5 | 81.1 | 25.3            | 53.4 | 66.4 |
| CAMP [42]        | -    | 72.3           | 94.8 | 98.3 | 58.5            | 87.9 | 95.0 | 50.1           | 82.1 | 89.7 | 39.0            | 68.9 | 80.2 |
| SCAN [18]        | -    | 72.7           | 94.8 | 98.4 | 58.8            | 88.4 | 94.8 | 50.4           | 82.2 | 90.0 | 38.6            | 69.3 | 80.4 |
| SCG [33]         | -    | 76.6           | 96.3 | 99.2 | 61.4            | 88.9 | 95.1 | 56.6           | 84.5 | 92.0 | 39.2            | 68.0 | 81.3 |
| PFAN [41]        | -    | 76.5           | 96.3 | 99.0 | 61.6            | 89.6 | 95.2 | -              | -    | -    | -               | -    | -    |
| Unicoder-VL [19] | B    | 84.3           | 97.3 | 99.3 | 69.7            | 93.5 | 97.2 | 62.3           | 87.1 | 92.8 | 46.7            | 76.0 | 85.3 |
| 12-in-1 [24]     | B    | -              | -    | -    | 65.2            | 91.0 | 96.2 | -              | -    | -    | -               | -    | -    |
| UNITER [5]       | B    | -              | -    | -    | -               | -    | -    | 63.3           | 87.0 | 93.1 | 48.4            | 76.7 | 85.9 |
| UNITER [5]       | L    | -              | -    | -    | -               | -    | -    | 66.6           | 89.4 | 94.3 | 51.7            | 78.4 | 86.9 |
| OSCAR            | B    | 88.4           | 99.1 | 99.8 | 75.7            | 95.2 | 98.3 | 70.0           | 91.1 | 95.5 | 54.0            | 80.8 | 88.5 |
|                  | L    | 89.8           | 98.8 | 99.7 | 78.2            | 95.8 | 98.3 | 73.5           | 92.2 | 96.0 | 57.5            | 82.8 | 89.8 |
