# Supplementary material
Source: ML conference proceedings conference paper supplement (https://www.ecva.net/papers/eccv_2020/papers_ECCV/html/123750120_ECCV_2020_paper.php)

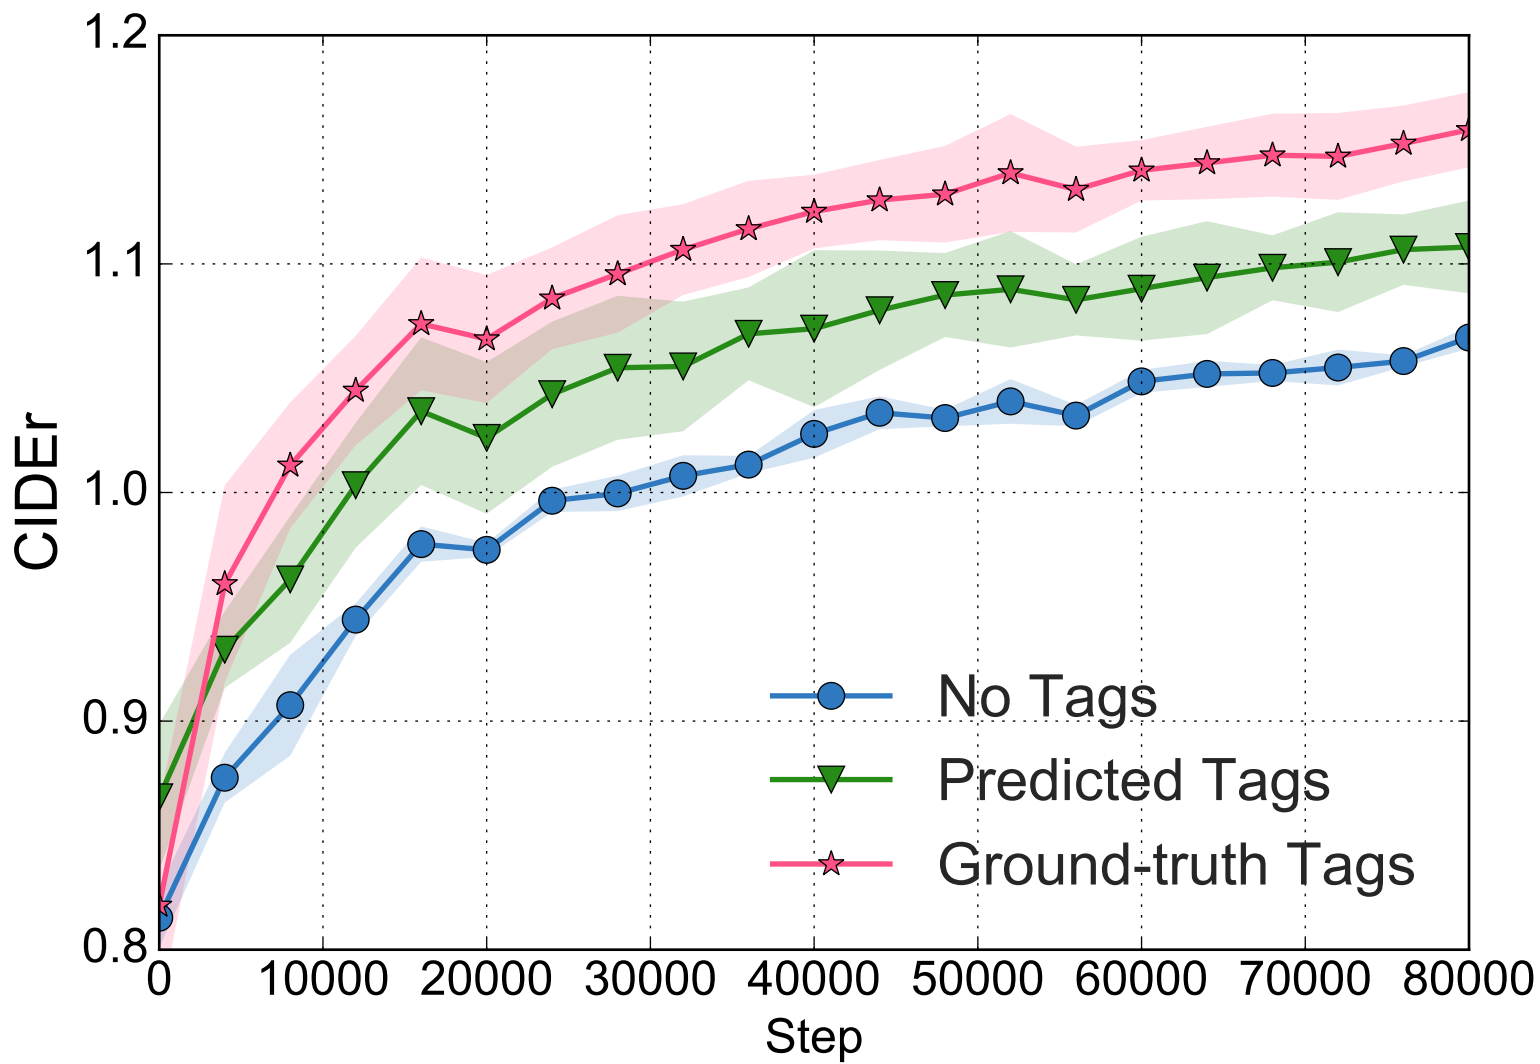

Supplement: Supplementary file 1 [file 123750120-supp.zip]

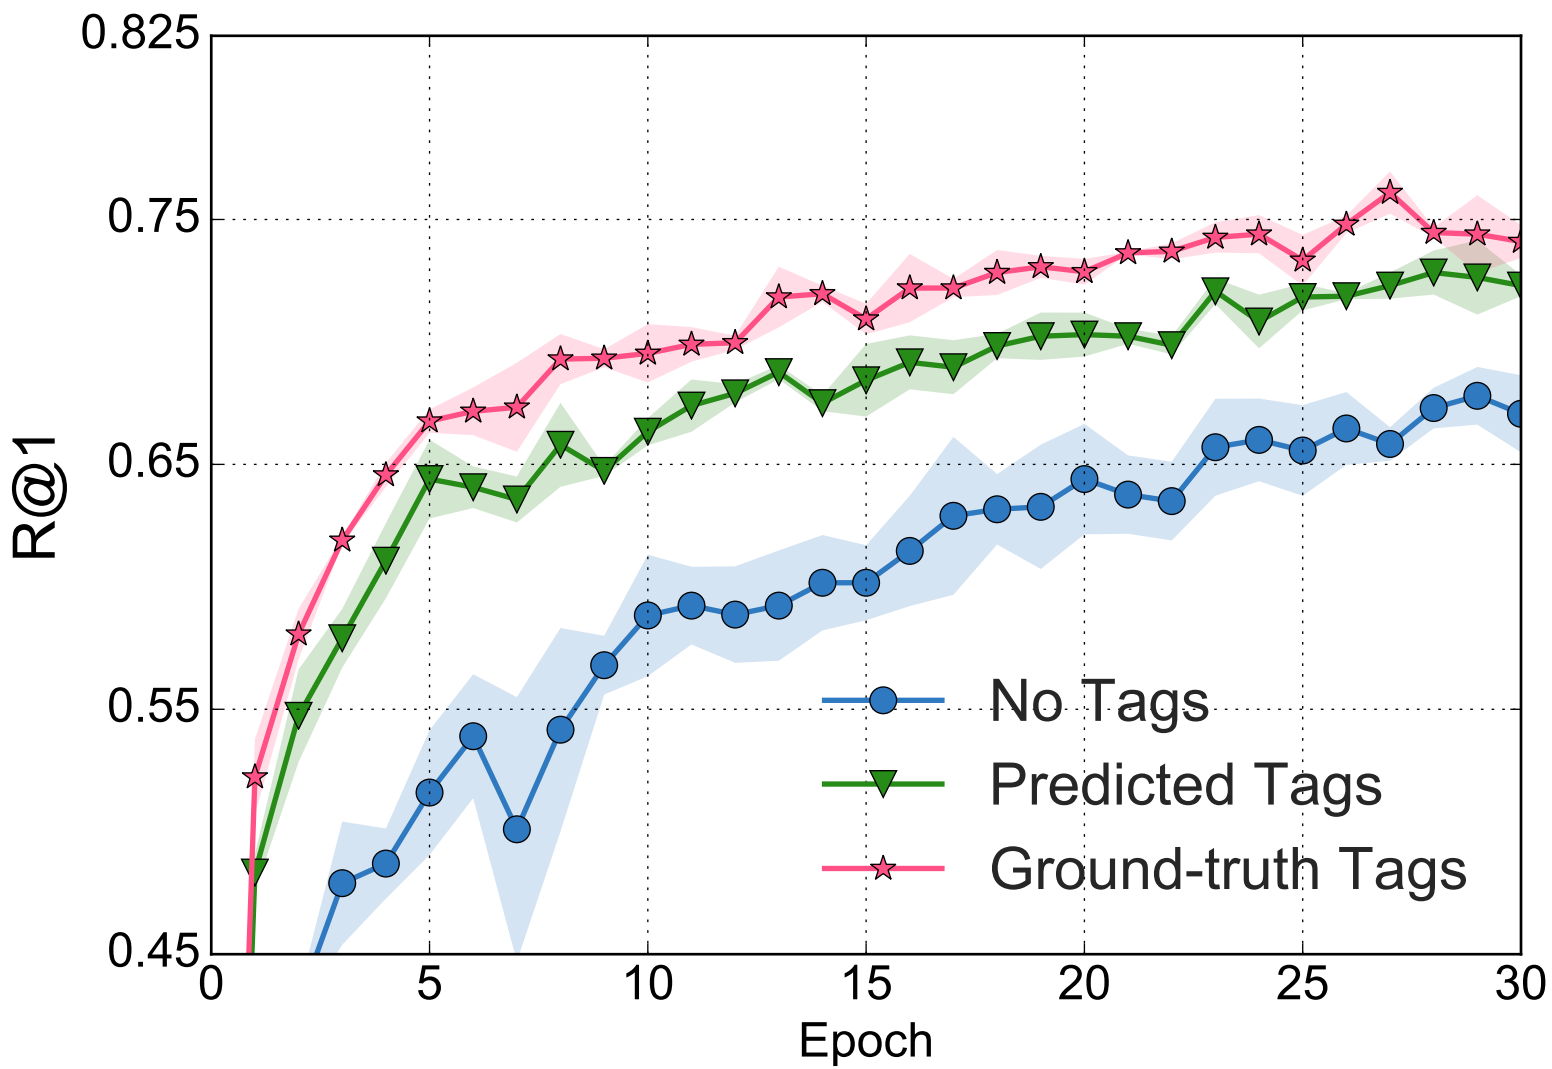

Supplement: Supplementary file 5 [file 123750120-supp.zip]

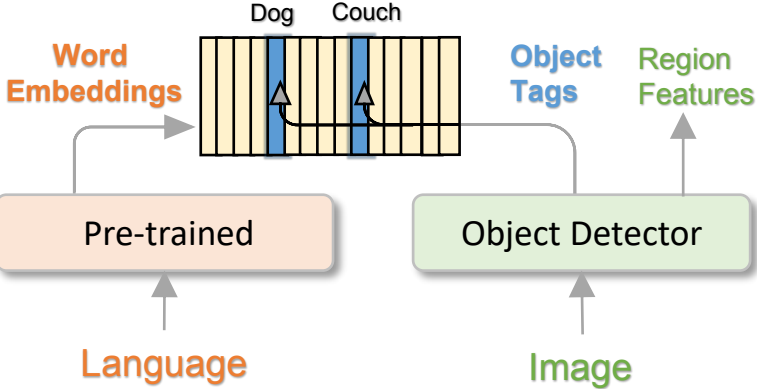

Supplement: Supplementary file 6 [file 123750120-supp.zip]

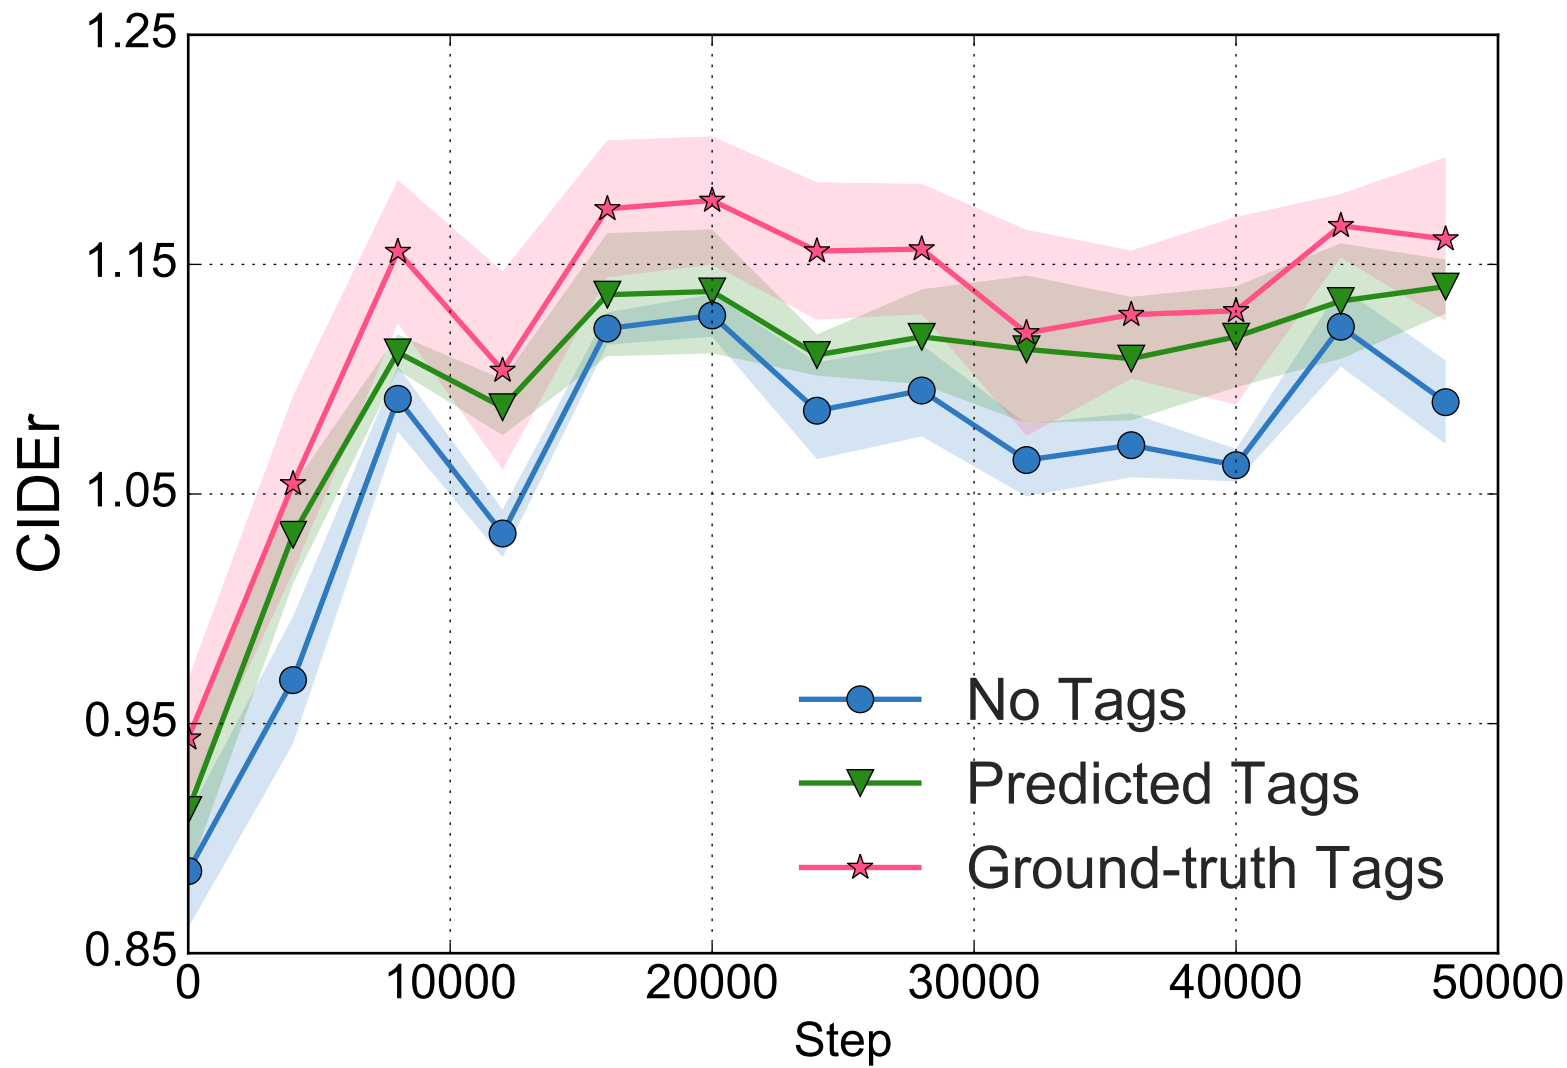

Supplement: Supplementary file 8 [file 123750120-supp.zip]

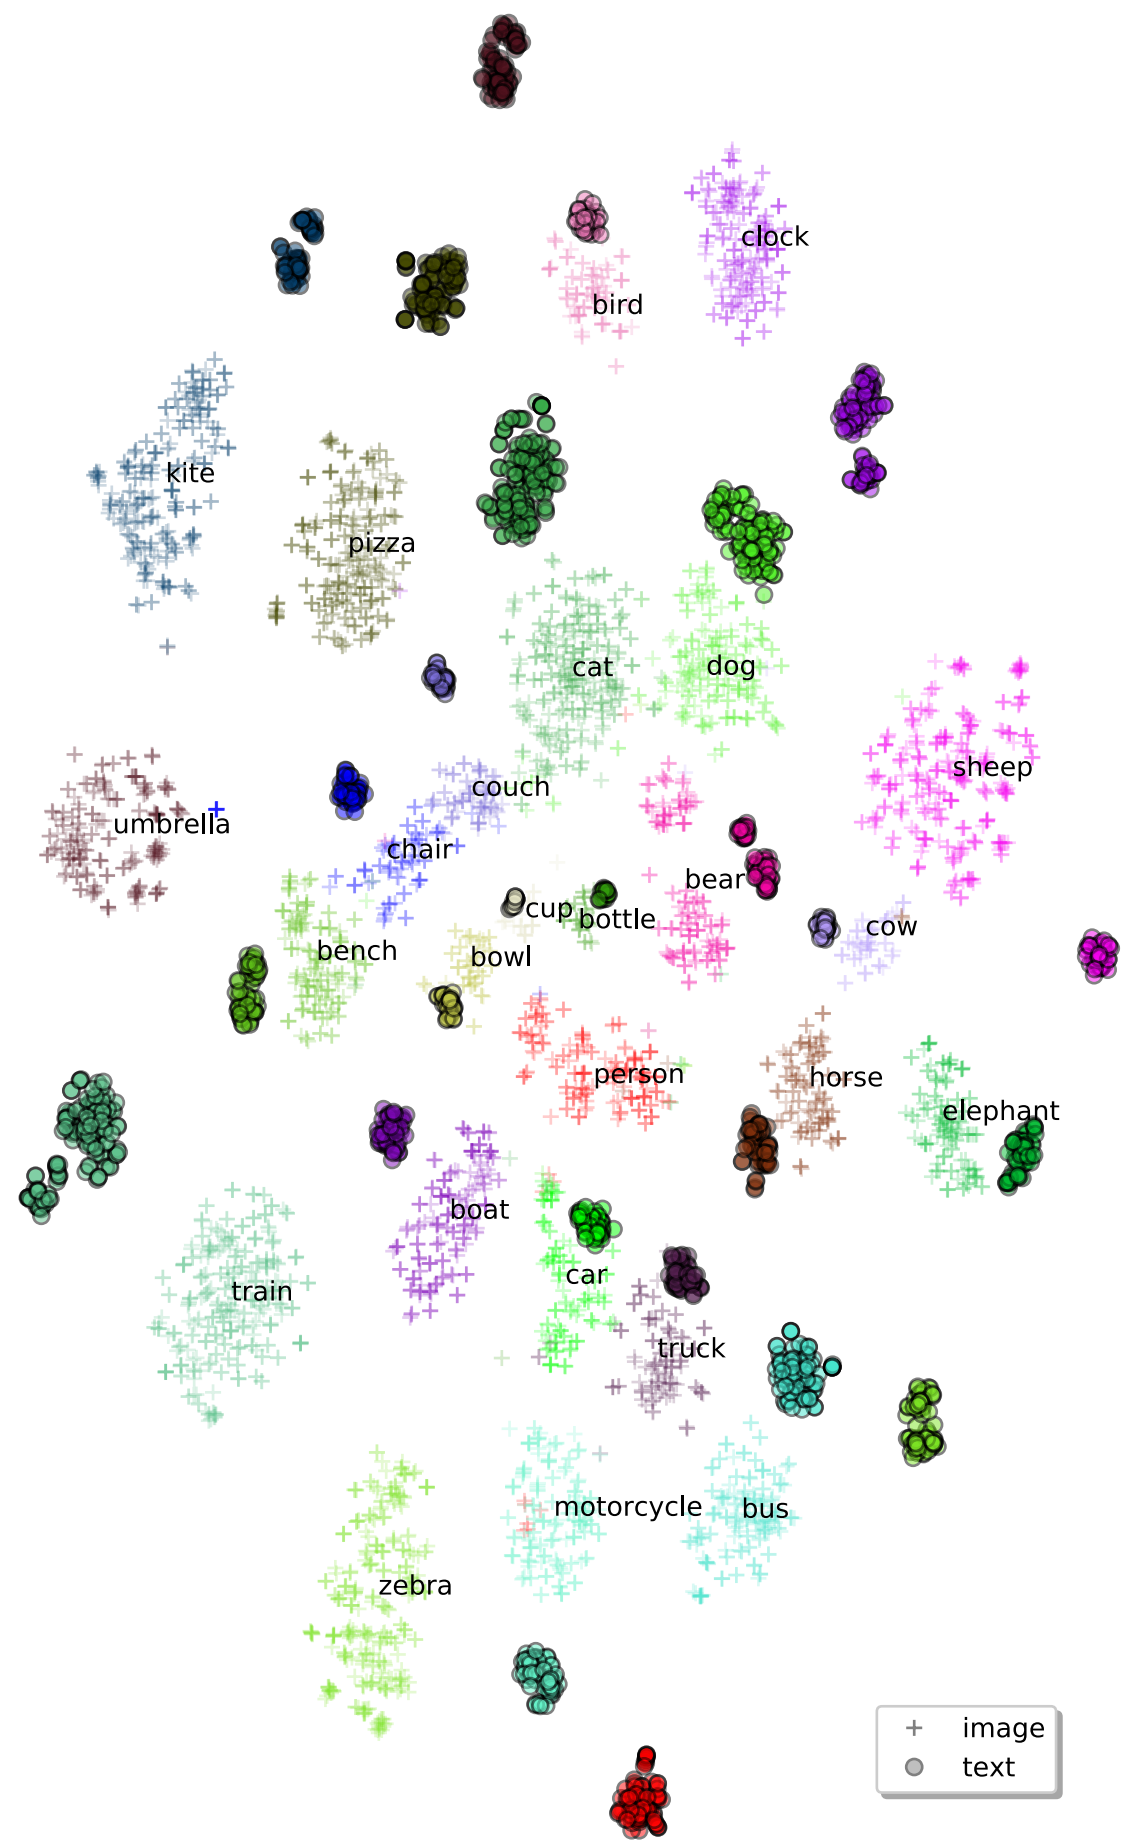

Supplement: Supplementary file 10 [file 123750120-supp.zip]

Learning curves

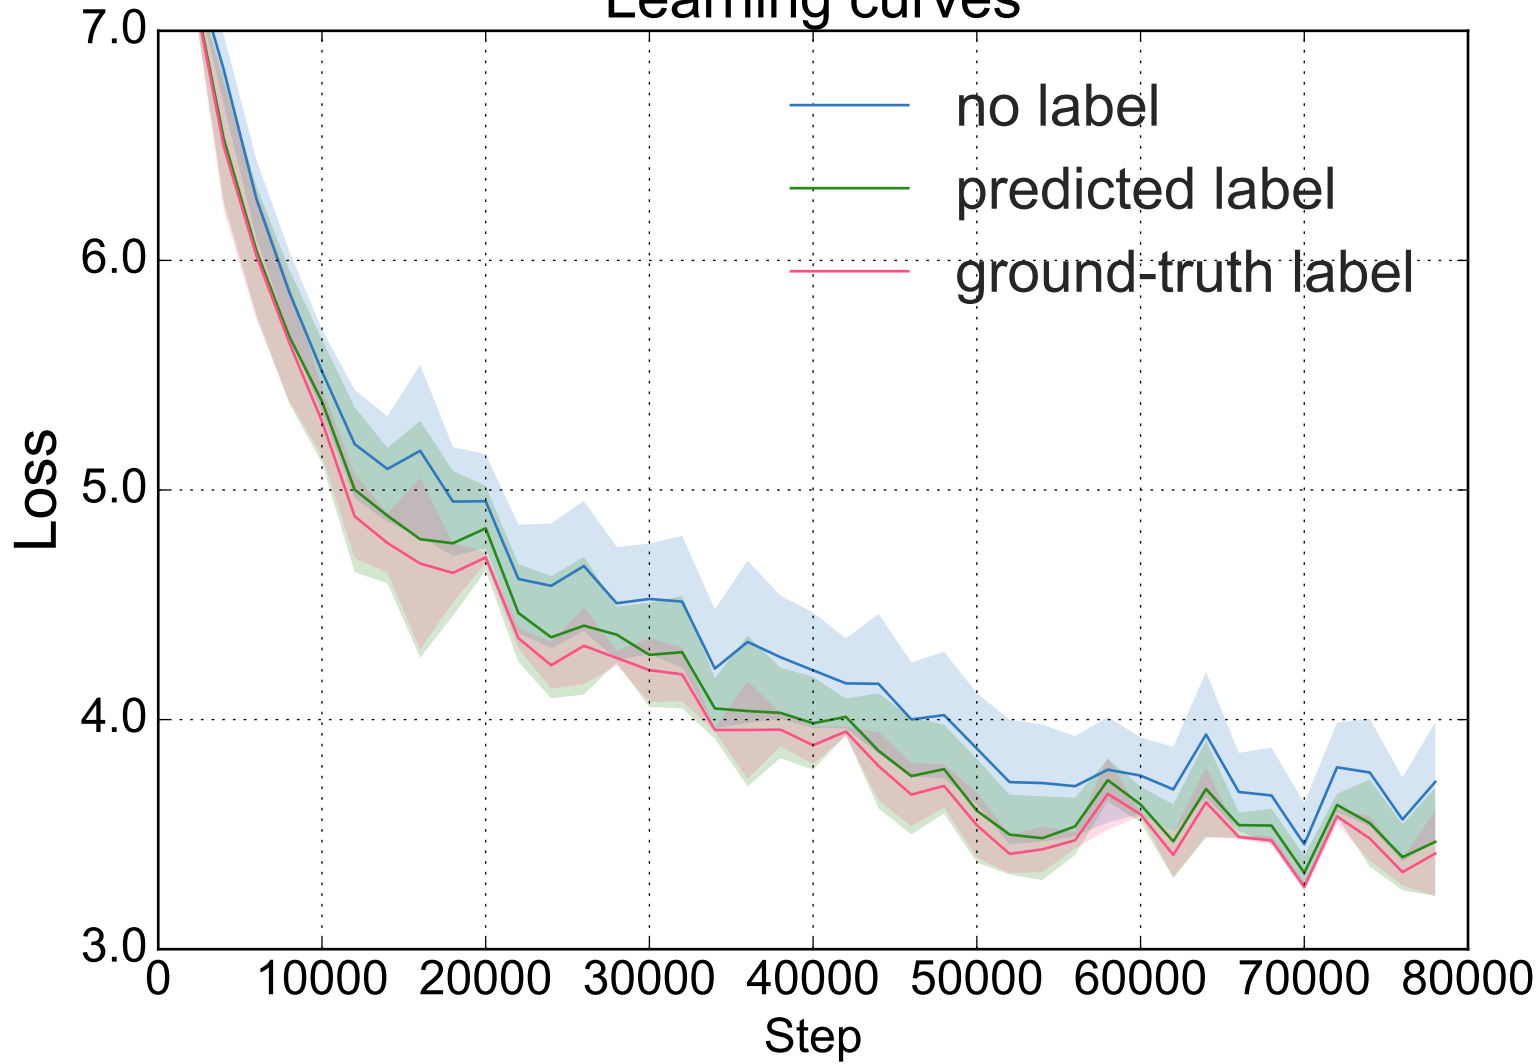

Supplement: Supplementary file 11 [file 123750120-supp.zip]

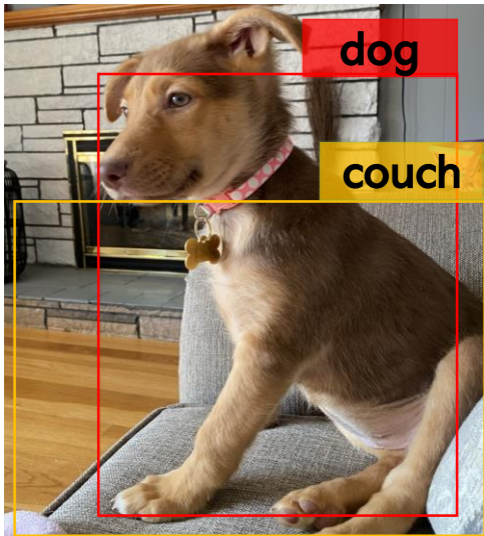

dog

couch

A **dog** is sitting on a **couch**

Supplement: Supplementary file 12 [file 123750120-supp.zip]

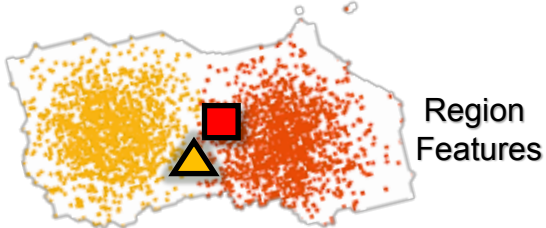

couch

dog

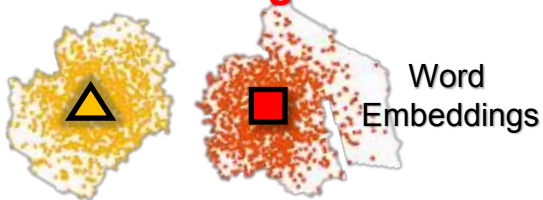

Supplement: Supplementary file 13 [file 123750120-supp.zip]

Learning curves

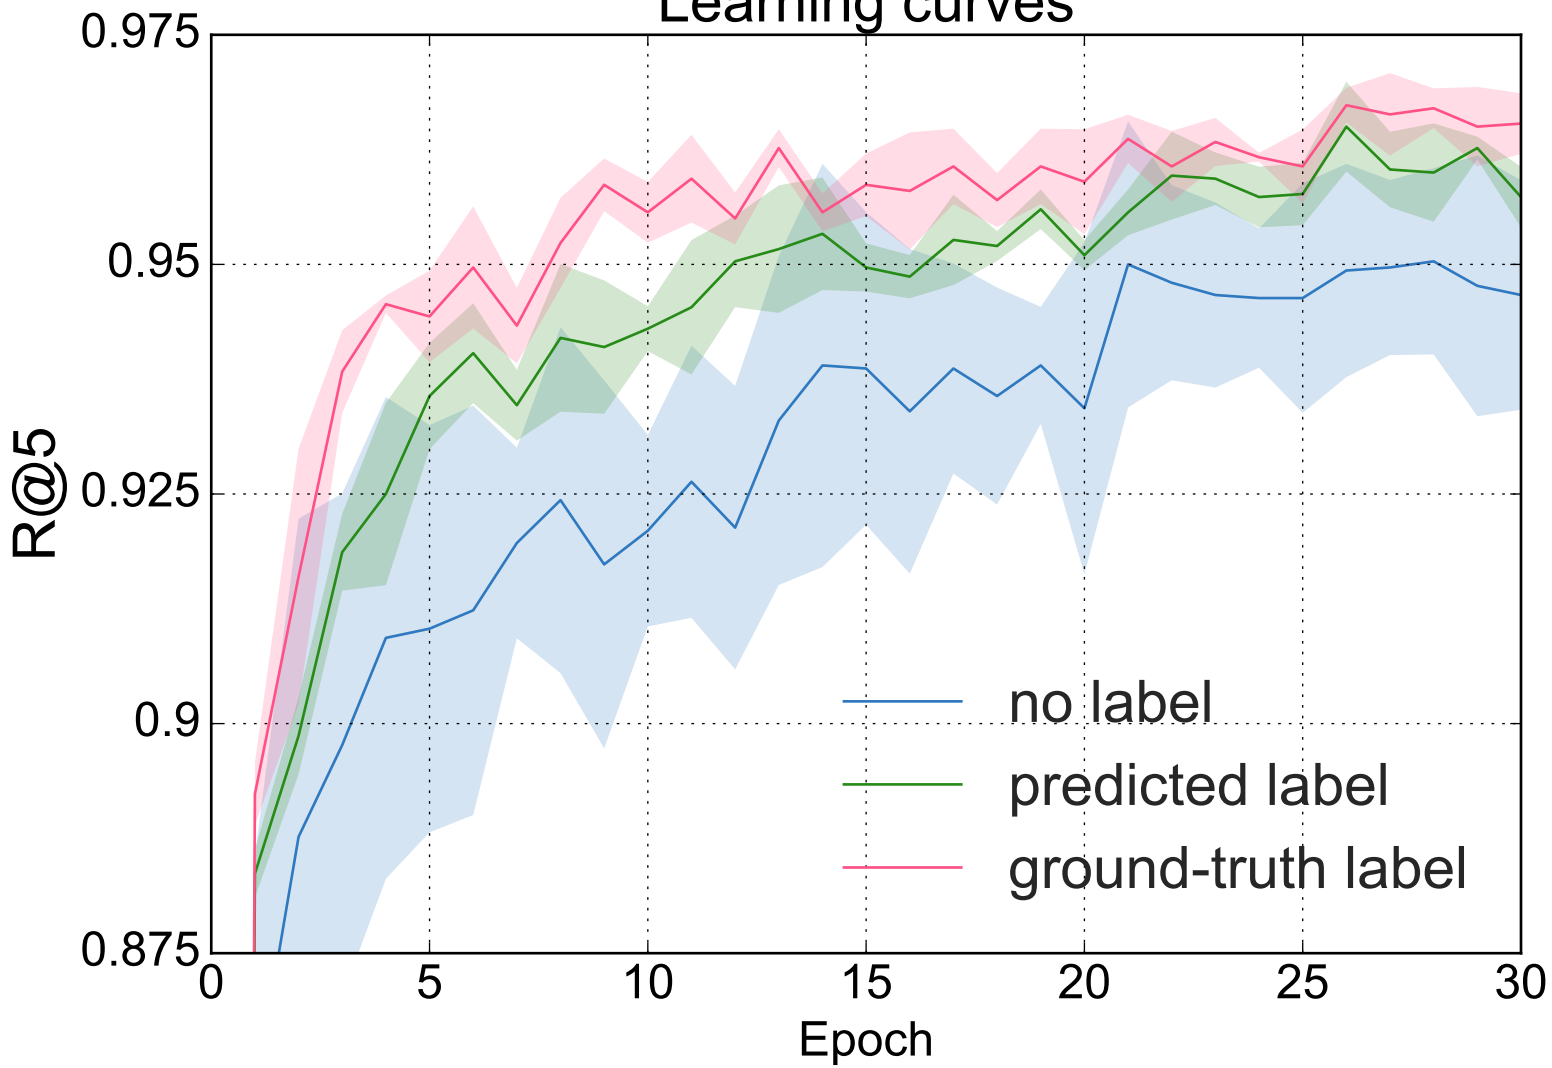

Supplement: Supplementary file 14 [file 123750120-supp.zip]

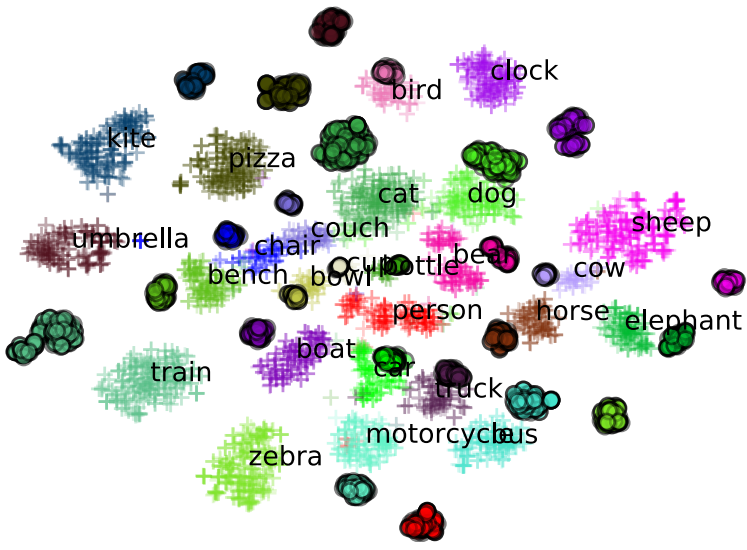

Supplement: Supplementary file 15 [file 123750120-supp.zip]

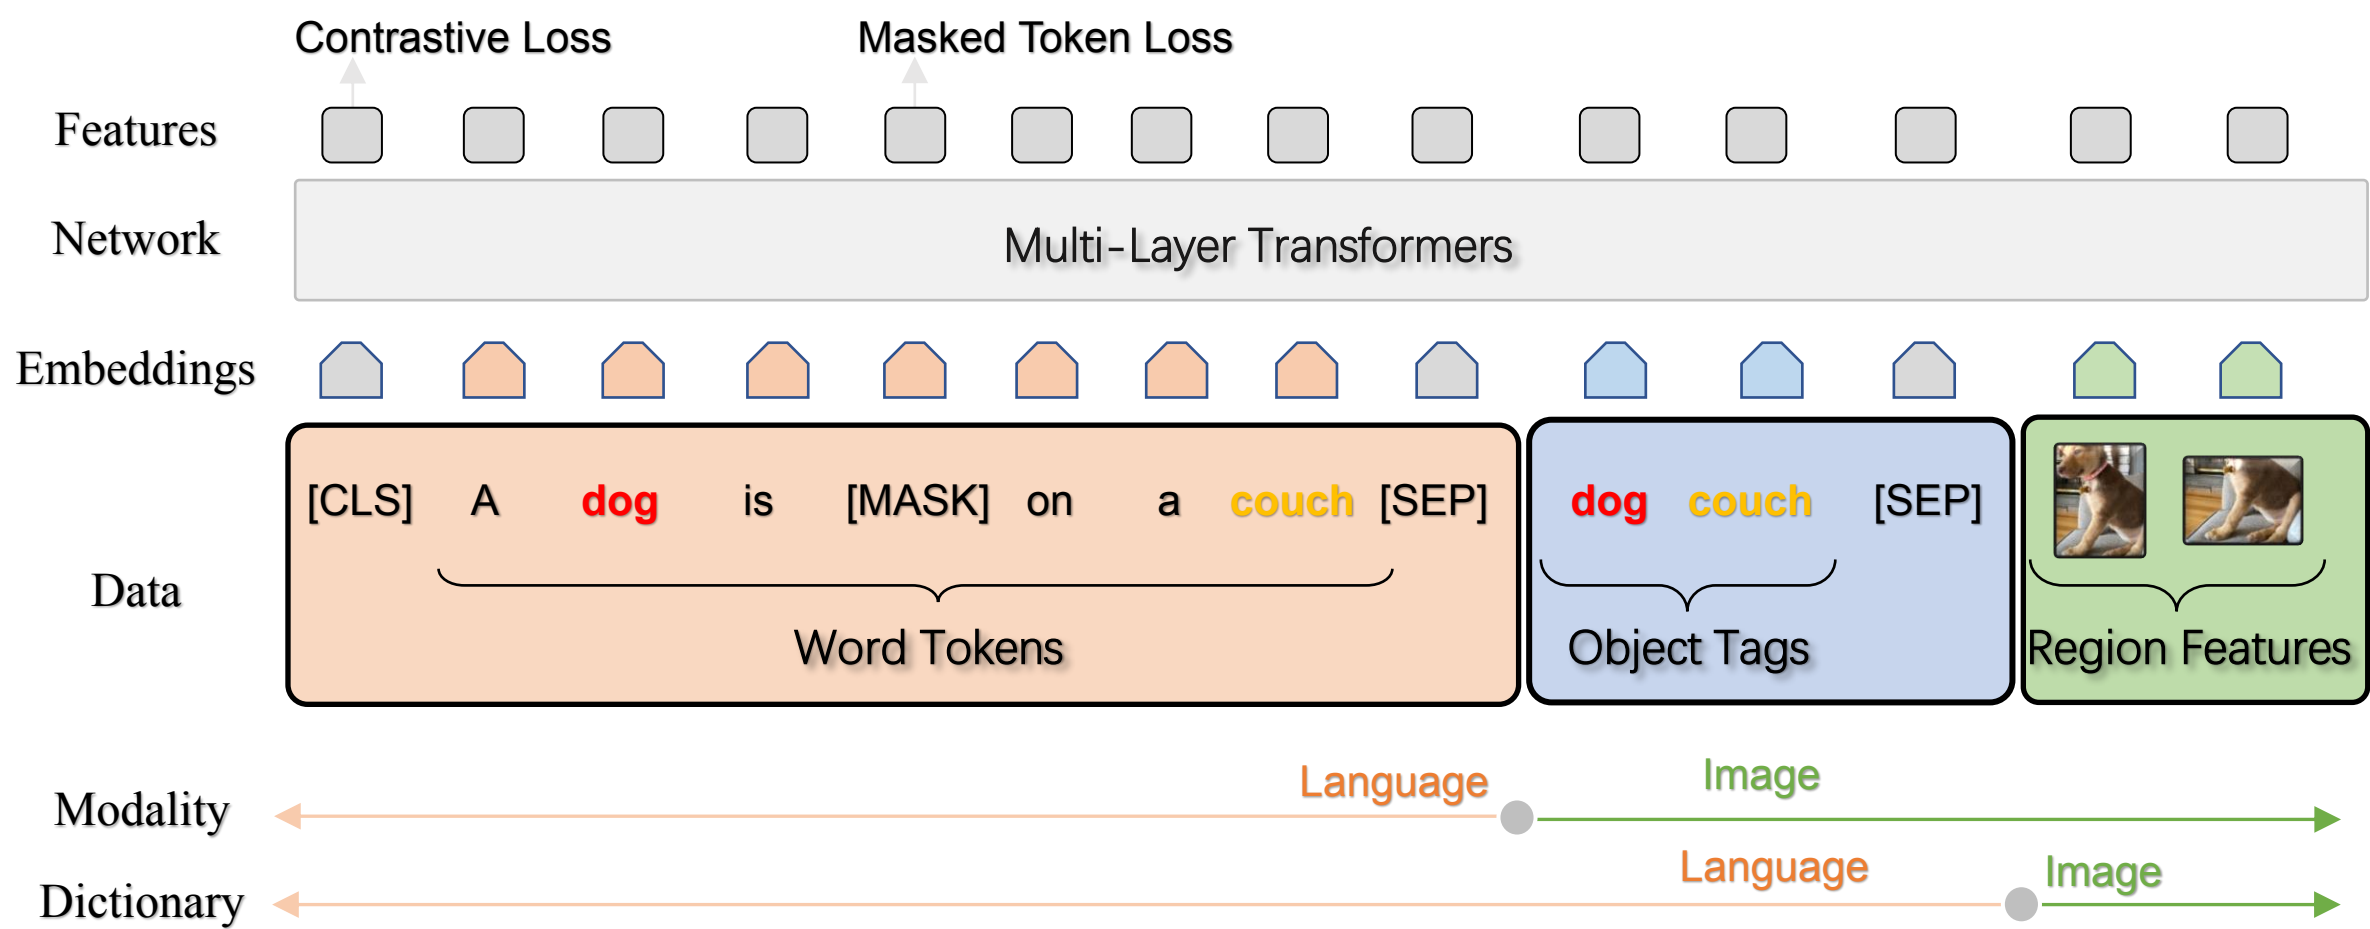

Supplement: Supplementary file 17 [file 123750120-supp.zip]

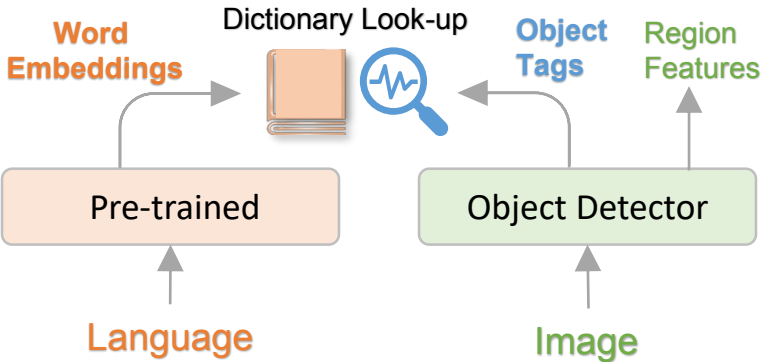

Supplement: Supplementary file 18 [file 123750120-supp.zip]

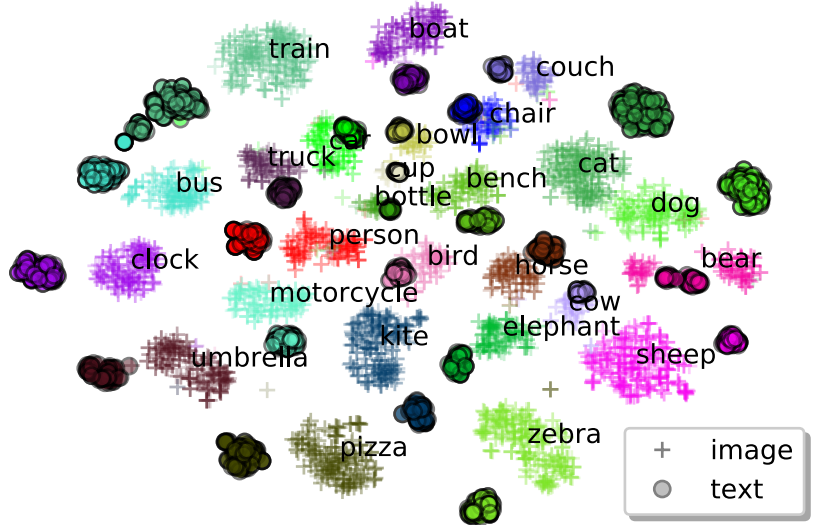

Supplement: Supplementary file 19 [file 123750120-supp.zip]

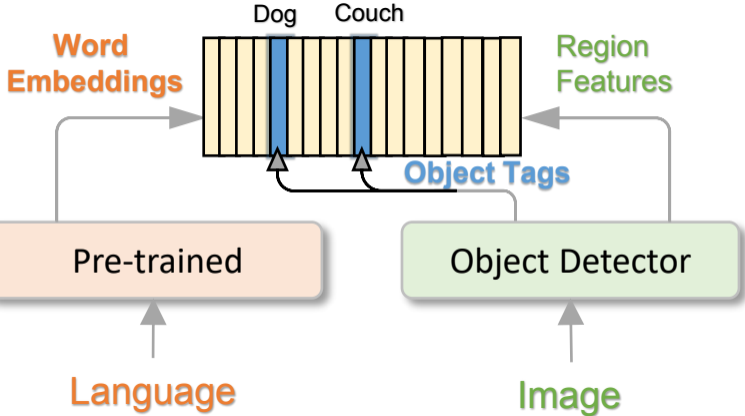

Supplement: Supplementary file 25 [file 123750120-supp.zip]

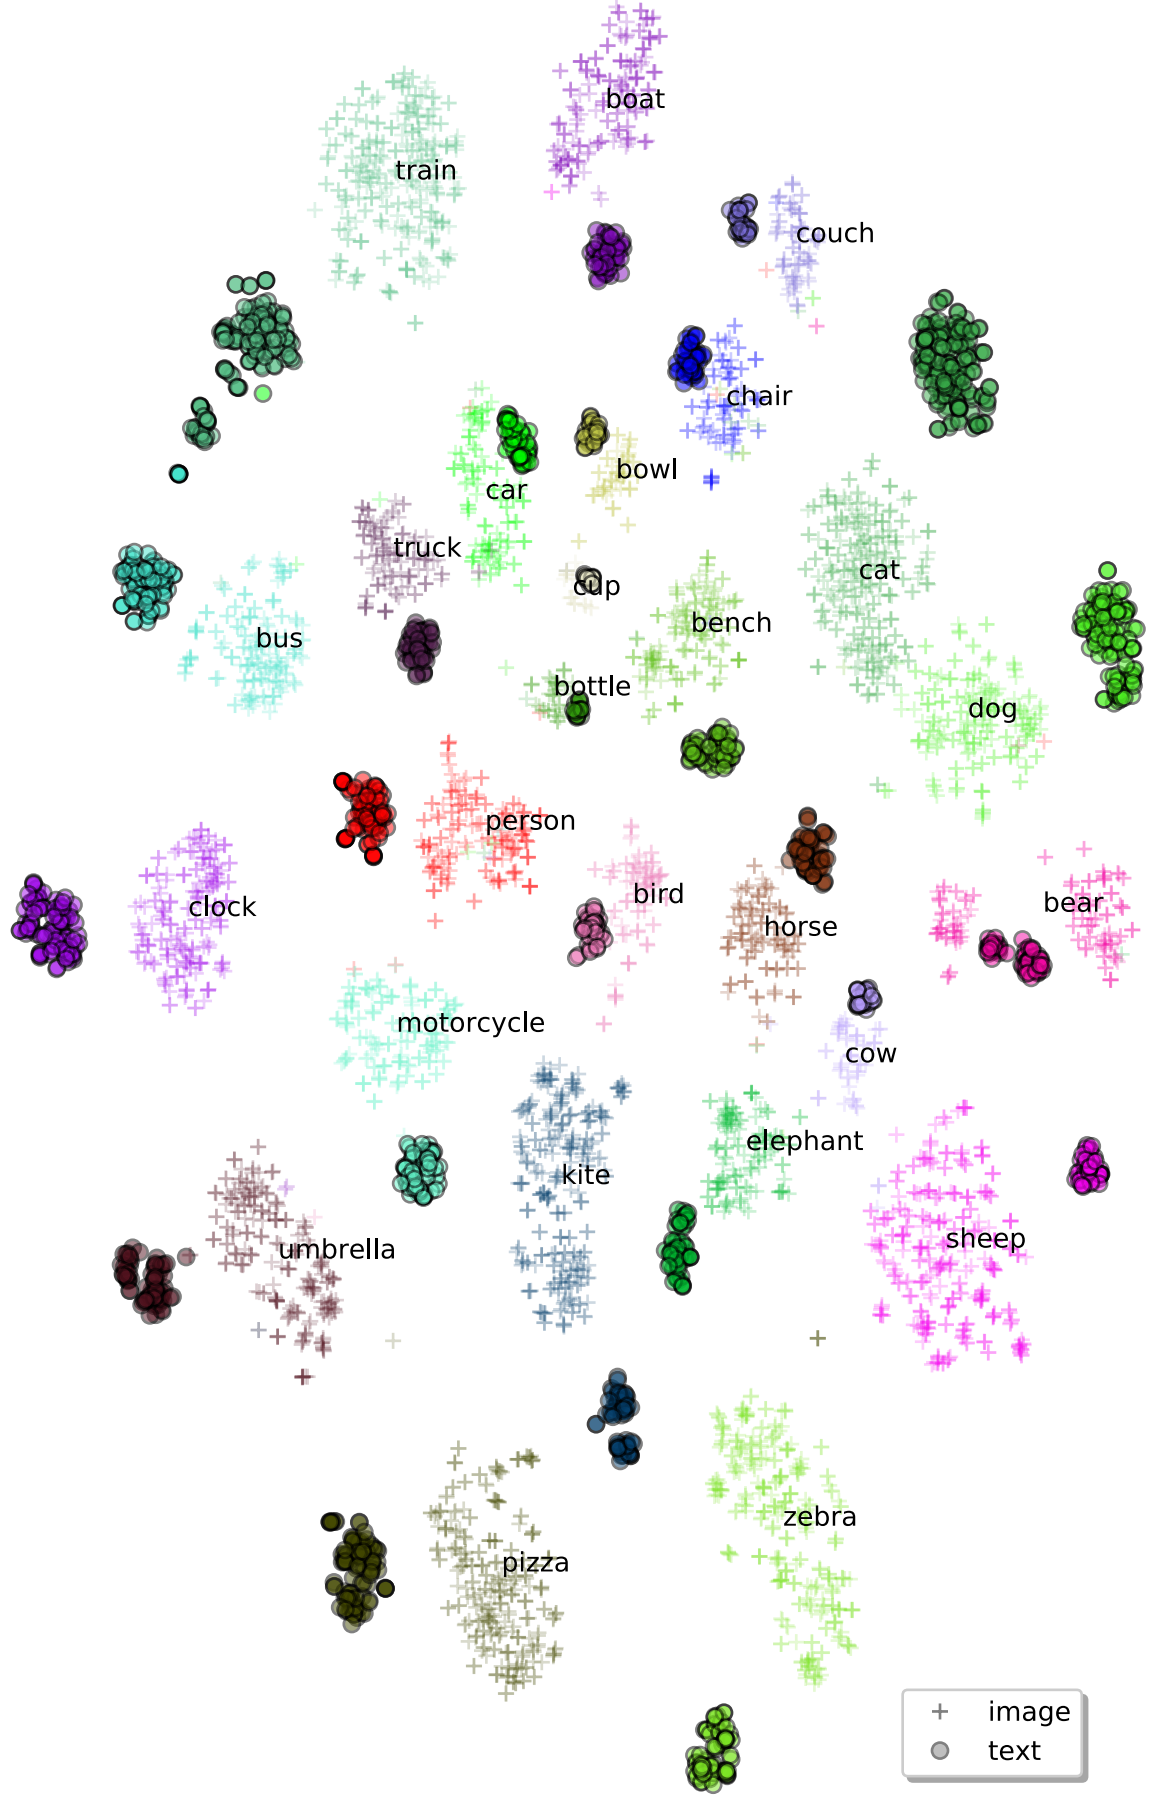

Supplement: Supplementary file 27 [file 123750120-supp.zip]

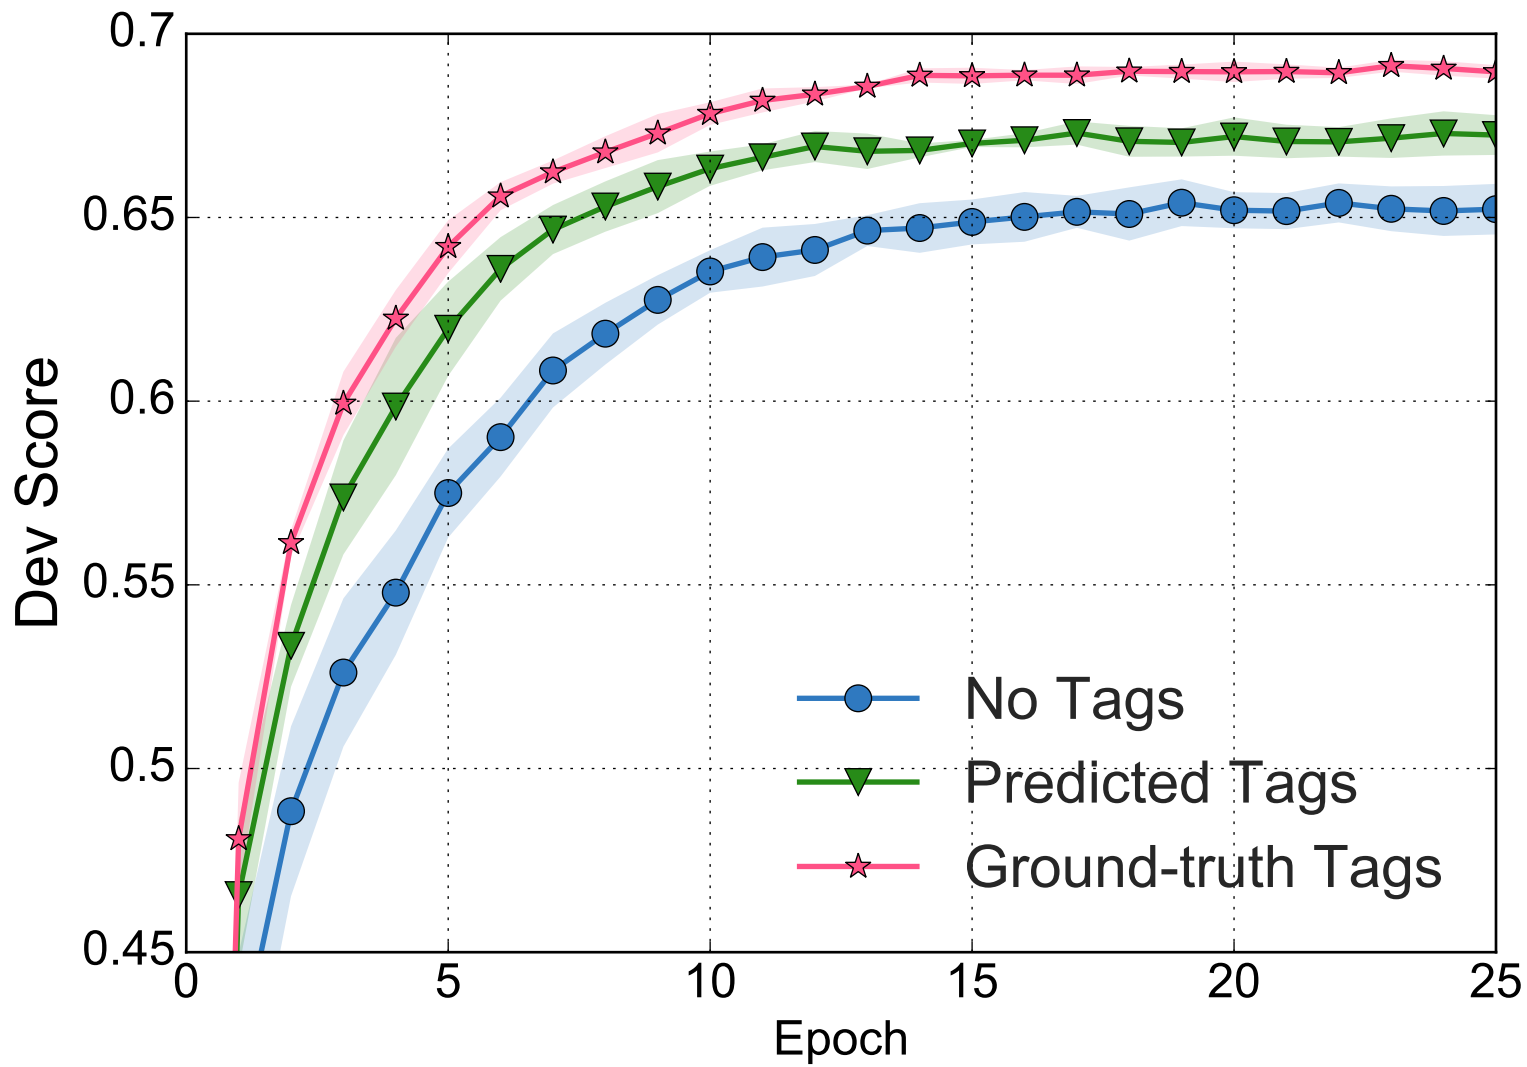

Supplement: Supplementary file 28 [file 123750120-supp.zip]
